# Supplementary material for: Clinically assisted hydration in patients in the last days of life (‘CHELsea II’ trial): a cluster randomised trial
Source: PubMed Central journal article supplement — BMJ Open. 2022 Nov 23;12(11):e068846. doi: 10.1136/bmjopen-2022-068846 (PMC9684991; doi:10.1136/bmjopen-2022-068846), 2022-11-23
Supplement: bmjopen-2022-068846.reviewer_comments.pdf [file bmjopen-2022-068846.reviewer_comments.pdf]

## PEER REVIEW HISTORY

BMJ Open publishes all reviews undertaken for accepted manuscripts. Reviewers are asked to complete a checklist review form (<http://bmjopen.bmj.com/site/about/resources/checklist.pdf>) and are provided with free text boxes to elaborate on their assessment. These free text comments are reproduced below.

## ARTICLE DETAILS

|                            |                                                                                                                                 |
|----------------------------|---------------------------------------------------------------------------------------------------------------------------------|
| <b>TITLE (PROVISIONAL)</b> | A CLUSTER RANDOMISED TRIAL OF CLINICALLY-ASSISTED HYDRATION IN PATIENTS IN THE LAST DAYS OF LIFE ("CHELsea II" TRIAL): PROTOCOL |
| <b>AUTHORS</b>             | Davies, Andrew; Waghorn, Melanie; Roberts, Megan; Gage, Heather; Skene, Simon                                                   |

This article was not externally reviewed at BMJ Open. Protocols that have been independently assessed prior to submission to BMJ Open are usually fast-tracked to publication on the grounds that further substantial changes will not be possible. This independent assessment will usually be external, independent review for both a substantial grant award from a non-commercial or government funder and ethics approval.
